# Supplementary material for: Preparation of SiO2@TiO2:Eu3+@TiO2 core double-shell microspheres for photodegradation of polyacrylamide
Source: Royal Society of Chemistry journal article supplement (doi:10.1039/c9ra06187h), 2019-01-01

## **Supporting Information:**

### **Preparation of $\text{SiO}_2@\text{TiO}_2:\text{Eu}^{3+}@\text{TiO}_2$ Core Double-Shell Microspheres for Photodegradation of Polyacrylamide**

Haoyang Zou,<sup>a</sup> Lan Wang,<sup>d</sup> Huaizhi Tao,<sup>d</sup> Yi Liu,<sup>a\*</sup> Meiqi Chang,<sup>b\*</sup> Shiyu Yao<sup>c\*</sup>

<sup>a</sup>State Key Laboratory of Supramolecular Structure and Materials, Jilin University, Changchun 130012, P. R. China. \*

<sup>b</sup>State Key Laboratory of High Performance Ceramics and Superfine Microstructure, Shanghai Institute of Ceramics, Chinese Academy of Sciences, Shanghai 200050, P. R. China. \*

<sup>c</sup>College of Physics, Jilin University, Changchun 130012, P. R. China. \*

<sup>d</sup>Research Institute of Drilling and Production Engineering Technology, CNPC Chuanqing Drilling Engineering Co., Ltd, Guanghan 618300, P. R. China.

**Fig. S1** XPS spectra of (a) Ti 2p of ST and STT-1.2, (b) O 1s of ST and STT-1.2.

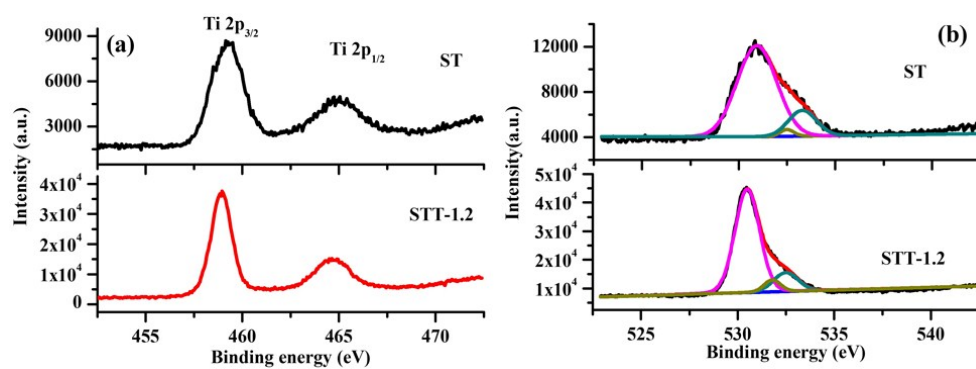

**Fig. S2** XRD patterns of ST without and with calcination at different temperature.

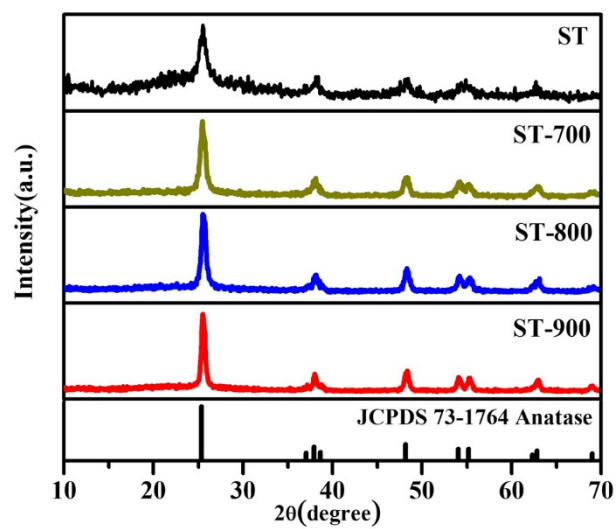

**Fig. S3** Standard curve of absorbance versus concentration of HPAM.

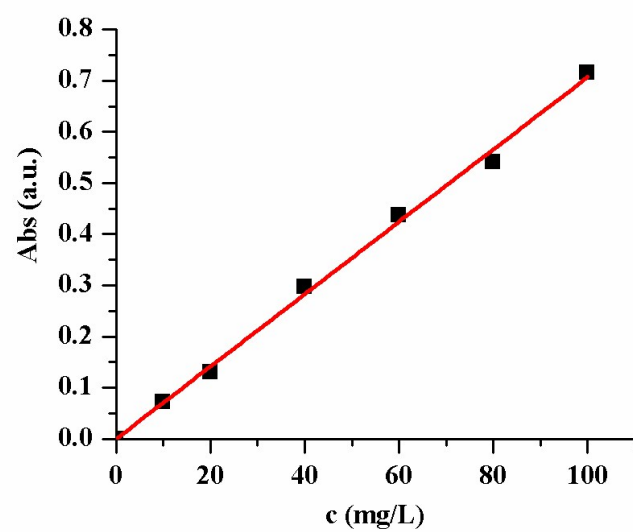

**Fig. S4** Temporal evolution of UV-vis absorption spectra during the photocatalytic degradation of HPAM in the presence of the (a) STT, (b) STT-700, (c) STT-800 and (d) STT-900.

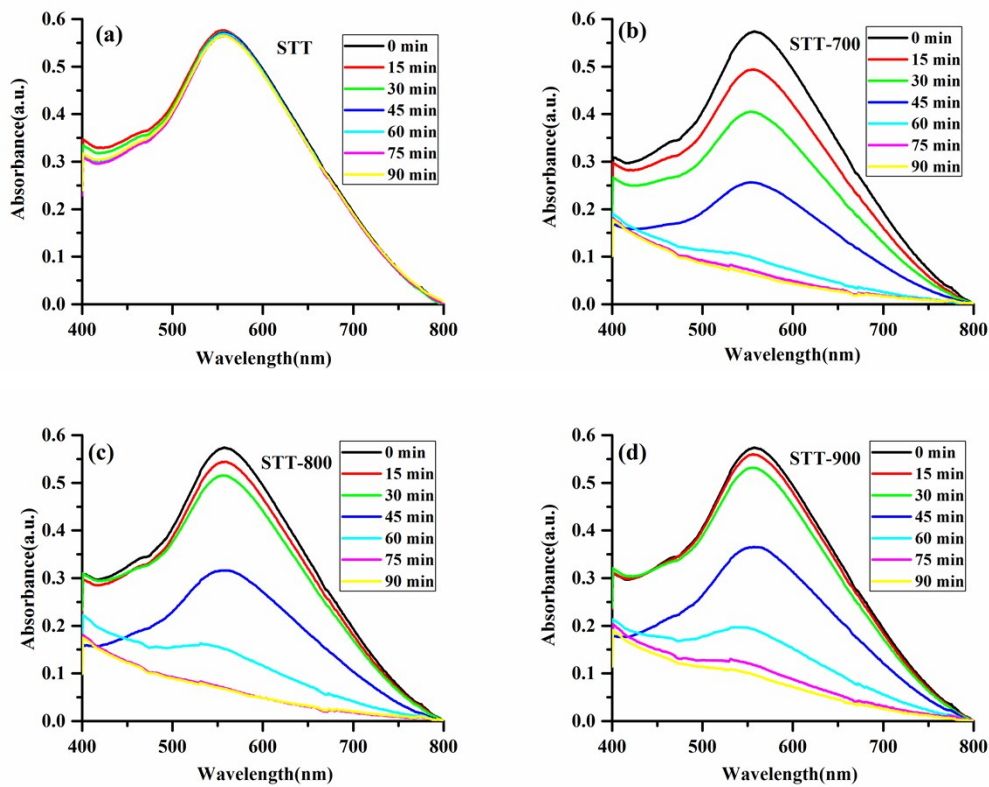

Supplement: c9ra06187h1.pdf [file c9ra06187h1.pdf]
